# Supplementary material for: A deep learning system for predicting time to progression of diabetic retinopathy
Source: PubMed Central journal article supplement (PMC10878973; doi:10.1038/s41591-023-02702-z), 2024-01-04
Supplement: 41591_2023_2702_MOESM1_ESM.pdf [file 41591_2023_2702_MOESM1_ESM.pdf]

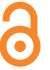

---

# A deep learning system for predicting time to progression of diabetic retinopathy

---

In the format provided by the authors and unedited

# A deep learning system for predicting time to progression of diabetic retinopathy

## Supplementary Information

### Contents

|                                                                                                                                                                                                                                 |    |
|---------------------------------------------------------------------------------------------------------------------------------------------------------------------------------------------------------------------------------|----|
| <b>Supplementary Table 1.</b> Performance of predicting DR progression in the fundus model with or without addition of HbA1c level at first follow-up visit by different glycemc control statuses in the internal test set..... | 2  |
| <b>Supplementary Table 2.</b> Clinical characteristics of participants in the Chinese real-world study at baseline and follow-up.....                                                                                           | 3  |
| <b>Supplementary Table 3.</b> Clinical characteristics of participants in the Indian real-world study at baseline and follow-up.....                                                                                            | 5  |
| <b>Supplementary Table 4.</b> Baseline retinal vascular measures between participants with and without any progression of DR, incidence of DR, referable DR, and VTDR.....                                                      | 7  |
| <b>Supplementary Table 5.</b> Relationships between retinal vascular measures (per SD increase) and any progression of DR, incidence of DR, referable DR, and VTDR.....                                                         | 8  |
| <b>Supplementary Table 6.</b> Performance of adding retinal vascular geometry to the metadata model for predictive tasks in the internal test set.....                                                                          | 9  |
| <b>Supplementary Table 7.</b> Effect of using MoCo v2 on the fundus model performance for predicting any DR progression in the internal test set .....                                                                          | 10 |
| <b>Supplementary Fig. 1.</b> Impact of image resolution on the predictive performance of the fundus model in the internal test set.....                                                                                         | 11 |

**Supplementary Table 1. Performance of predicting DR progression in the fundus model with or without addition of HbA1c level at first follow-up visit by different glycemic control statuses in the internal test set.**

| Glycemic control | Fundus model         |                      | Fundus model<br>+ HbA1c at the first follow-up visit |                      |
|------------------|----------------------|----------------------|------------------------------------------------------|----------------------|
|                  | AUC (95%CI)          | C-index (95%CI)      | AUC (95%CI)                                          | C-index (95%CI)      |
| Optimal          | 0.843 (0.781, 0.900) | 0.838 (0.778, 0.893) | 0.845 (0.784, 0.904)                                 | 0.840 (0.782, 0.897) |
| Suboptimal       | 0.806 (0.759, 0.848) | 0.804 (0.759, 0.846) | 0.813 (0.768, 0.856)                                 | 0.812 (0.768, 0.853) |
| Poor             | 0.838 (0.795, 0.878) | 0.836 (0.795, 0.875) | 0.841 (0.802, 0.881)                                 | 0.839 (0.801, 0.878) |

Optimal glycemic control, HbA1c <7% throughout five-year follow-up;

Suboptimal glycemic control, HbA1c <7% in some visits and ≥7% in the other visits;

Poor glycemic control, HbA1c ≥7% throughout five-year follow-up.

**Supplementary Table 2. Clinical characteristics of participants in the Chinese real-world study at baseline and follow-up.**

|                                        | Baseline                         |                                          | P value |
|----------------------------------------|----------------------------------|------------------------------------------|---------|
|                                        | Integrated Management Group (IM) | Non-integrated Management Group (Non-IM) |         |
| Number of participants                 | 538                              | 1647                                     |         |
| Number of eyes                         | 1076                             | 3294                                     |         |
| Age (years)                            | 55.62 ± 9.39                     | 54.66 ± 9.96                             | 0.051   |
| Gender (Male:Female)                   | 472:66                           | 1361:286                                 | 0.005   |
| Smoking (number, rate)                 | 304, 56.51%                      | 962, 58.41%                              | 0.437   |
| Drinking (number, rate)                | 361, 67.10%                      | 1072, 65.09%                             | 0.394   |
| BMI (kg/m <sup>2</sup> )               | 26.05 ± 3.20                     | 26.48 ± 3.44                             | 0.048   |
| Waist (cm)                             | 88.37 ± 9.19                     | 89.52 ± 8.71                             | 0.011   |
| Hip (cm)                               | 96.17 ± 6.14                     | 96.53 ± 6.70                             | 0.287   |
| SBP (mmHg)                             | 126.40 ± 13.19                   | 131.19 ± 17.23                           | <0.001  |
| DBP (mmHg)                             | 74.74 ± 10.19                    | 77.17 ± 11.28                            | <0.001  |
| TC (mmol/L)                            | 4.45 ± 0.85                      | 5.18 ± 1.05                              | <0.001  |
| TG (mmol/L)                            | 2.07 ± 1.56                      | 2.19 ± 1.43                              | 0.123   |
| HDL-C (mmol/L)                         | 1.22 ± 0.31                      | 1.24 ± 0.32                              | 0.173   |
| LDL-C (mmol/L)                         | 2.60 ± 0.60                      | 3.23 ± 0.82                              | <0.001  |
| HbA1c (%)                              | 6.52 ± 0.66                      | 7.21 ± 1.35                              | <0.001  |
| FPG (mmol/L)                           | 7.19 ± 1.24                      | 7.92 ± 2.21                              | <0.001  |
| Serum insulin (pmol/L)                 | 66.99 ± 43.98                    | 68.06 ± 47.72                            | 0.658   |
| Serum C peptide (ng/mL)                | 2.81 ± 1.30                      | 2.79 ± 1.00                              | 0.877   |
| GA (%)                                 | 15.61 ± 2.25                     | 17.38 ± 4.15                             | <0.001  |
| Scr (μmol/L)                           | 76.46 ± 15.59                    | 74.47 ± 17.68                            | 0.019   |
| BUN (mmol/L)                           | 5.85 ± 1.39                      | 5.86 ± 1.42                              | 0.868   |
| Serum uric acid (umol/L)               | 364.07 ± 87.14                   | 386.77 ± 89.67                           | 0.947   |
| hsCRP (mg/L)                           | 1.60 ± 2.51                      | 1.75 ± 2.21                              | 0.185   |
| TnT (pg/mL)                            | 2.26 ± 4.00                      | 2.23 ± 4.50                              | 0.942   |
| Eyes with DR (number, prevalence rate) | 92, 8.55%                        | 344, 10.44%                              | 0.072   |

|                                              | Follow-up                        |                                          | P value |
|----------------------------------------------|----------------------------------|------------------------------------------|---------|
|                                              | Integrated Management Group (IM) | Non-integrated Management Group (Non-IM) |         |
| Number of participants                       | 538                              | 1647                                     |         |
| Number of eyes                               | 1076                             | 3294                                     |         |
| Age (years)                                  | 60.62 ± 9.39                     | 59.66 ± 9.96                             | 0.051   |
| Gender (Male:Female)                         | 472:66                           | 1361:286                                 | 0.005   |
| Smoking (number, rate)                       | 302, 56.13%                      | 969, 58.83%                              | 0.270   |
| Drinking (number, rate)                      | 352, 65.43%                      | 1081, 65.63%                             | 0.930   |
| BMI (kg/m <sup>2</sup> )                     | 25.97 ± 3.03                     | 26.40 ± 3.46                             | 0.013   |
| Waist (cm)                                   | 88.64 ± 7.97                     | 89.56 ± 8.97                             | 0.042   |
| Hip (cm)                                     | 96.24 ± 5.58                     | 96.92 ± 6.26                             | 0.022   |
| SBP (mmHg)                                   | 126.93 ± 12.99                   | 131.19 ± 16.36                           | <0.001  |
| DBP (mmHg)                                   | 74.90 ± 9.77                     | 77.36 ± 10.71                            | <0.001  |
| TC (mmol/L)                                  | 4.31 ± 0.73                      | 5.35 ± 0.99                              | <0.001  |
| TG (mmol/L)                                  | 2.22 ± 1.73                      | 2.45 ± 1.56                              | 0.004   |
| HDL-C (mmol/L)                               | 1.23 ± 0.34                      | 1.25 ± 0.33                              | 0.083   |
| LDL-C (mmol/L)                               | 2.37 ± 0.49                      | 3.33 ± 0.81                              | <0.001  |
| HbA1c (%)                                    | 6.31 ± 0.48                      | 7.18 ± 1.35                              | <0.001  |
| FPG (mmol/L)                                 | 7.06 ± 1.09                      | 8.21 ± 2.28                              | <0.001  |
| Serum insulin (pmol/L)                       | 67.66 ± 42.67                    | 69.18 ± 45.91                            | 0.514   |
| Serum C peptide (ng/mL)                      | 2.90 ± 2.07                      | 2.82 ± 1.11                              | 0.675   |
| GA (%)                                       | 15.53 ± 2.13                     | 17.67 ± 4.17                             | <0.001  |
| Scr (μmol/L)                                 | 77.35 ± 15.51                    | 75.64 ± 18.52                            | 0.054   |
| BUN (mmol/L)                                 | 5.87 ± 1.27                      | 5.87 ± 1.42                              | 0.978   |
| Serum uric acid (μmol/L)                     | 383.84 ± 88.21                   | 384.98 ± 95.85                           | 0.799   |
| hsCRP (mg/L)                                 | 1.49 ± 1.89                      | 1.82 ± 2.14                              | 0.001   |
| TnT (pg/mL)                                  | 2.03 ± 3.89                      | 1.69 ± 3.99                              | 0.419   |
| Eyes with DR (number, prevalence rate)       | 165, 15.33%                      | 585, 17.76%                              | 0.067   |
| Eyes with DR progression (number, incidence) | 76, 7.06%                        | 265, 8.04%                               | 0.297   |

BMI, body mass index; SBP, systolic blood pressure; DBP, diastolic blood pressure; TC, total cholesterol; TG, triglyceride; HDL-C, high-density lipoprotein cholesterol; LDL-C, low-density lipoprotein cholesterol; HbA1c, Glycosylated hemoglobin A1c; FPG, fasting plasma glucose; GA, glycosylated albumin; Scr, Serum creatinine; BUN, Blood urea nitrogen; hsCRP, Hypersensitive C-reactive protein; TnT, Troponin T.

**Supplementary Table 3. Clinical characteristics of participants in the Indian real-world study at baseline and follow-up.**

|                                        | Baseline                         |                                          | P value |
|----------------------------------------|----------------------------------|------------------------------------------|---------|
|                                        | Integrated Management Group (IM) | Non-integrated Management Group (Non-IM) |         |
| Number of participants                 | 76                               | 916                                      |         |
| Number of eyes*                        | 146                              | 1798                                     |         |
| Age (years)                            | 55.79 ± 10.14                    | 55.15 ± 9.41                             | 0.573   |
| Gender (Male:Female)                   | 47:29                            | 473:443                                  | 0.231   |
| Smoking (number, rate)                 | 8, 10.53%                        | 94, 10.26%                               | 0.491   |
| BMI (kg/m <sup>2</sup> )               | 25.23 ± 3.49                     | 25.83 ± 5.17                             | 0.351   |
| SBP (mmHg)                             | 137.32 ± 20.37                   | 138.03 ± 20.31                           | 0.769   |
| DBP (mmHg)                             | 80.55 ± 11.51                    | 82.25 ± 11.21                            | 0.205   |
| TG (mmol/L)                            | 139.26 ± 19.95                   | 188.24 ± 39.01                           | <0.001  |
| HDL-C (mmol/L)                         | 0.94 ± 0.25                      | 1.01 ± 0.25                              | 0.034   |
| LDL-C (mmol/L)                         | 1.94 ± 0.54                      | 3.06 ± 0.94                              | <0.001  |
| HbA1c (%)                              | 5.92 ± 0.57                      | 8.18 ± 2.12                              | <0.001  |
| Eyes with DR (number, prevalence rate) | 5, 3.42%                         | 208, 11.57%                              | 0.003   |

  

|                                              | Follow-up                        |                                          | P value |
|----------------------------------------------|----------------------------------|------------------------------------------|---------|
|                                              | Integrated Management Group (IM) | Non-integrated Management Group (Non-IM) |         |
| Number of participants                       | 76                               | 916                                      |         |
| Number of eyes*                              | 146                              | 1798                                     |         |
| Age (years)                                  | 59.79 ± 10.14                    | 59.15 ± 9.41                             | 0.573   |
| Gender (Male:Female)                         | 47:29                            | 473:443                                  | 0.231   |
| Smoking (number, rate)                       | 6, 7.89%                         | 74, 8.08%                                | 0.673   |
| BMI (kg/m <sup>2</sup> )                     | 25.10 ± 3.66                     | 25.44 ± 4.22                             | 0.505   |
| SBP (mmHg)                                   | 131.76 ± 16.26                   | 133.47 ± 18.65                           | 0.439   |
| DBP (mmHg)                                   | 77.26 ± 8.71                     | 78.19 ± 9.29                             | 0.402   |
| TG (mmol/L)                                  | 100.17 ± 66.17                   | 117.26 ± 71.21                           | 0.044   |
| HDL-C (mmol/L)                               | 36.89 ± 14.60                    | 38.81 ± 11.25                            | 0.165   |
| LDL-C (mmol/L)                               | 74.59 ± 18.09                    | 104.23 ± 33.98                           | <0.001  |
| HbA1c (%)                                    | 5.71 ± 0.83                      | 7.38 ± 1.71                              | <0.001  |
| Eyes with DR (number, prevalence rate)       | 8, 5.48%                         | 270, 15.02%                              | 0.001   |
| Eyes with DR progression (number, incidence) | 8, 5.48%                         | 189, 10.51%                              | 0.212   |

BMI, body mass index; SBP, systolic blood pressure; DBP, diastolic blood pressure; TG, triglyceride; HDL-C, high-density lipoprotein cholesterol; LDL-C, low-density lipoprotein cholesterol; HbA1c, Glycosylated hemoglobin A1c.

\*Only eyes with gradable fundus images in both baseline and follow-up visits in the Sankara Nethralaya-Diabetic Retinopathy Epidemiology and Molecular Genetics Study were included.

**Supplementary Table 4. Baseline retinal vascular measures between participants with and without any progression of DR, incidence of DR, referable DR, and VTDR.**

|                   | Any progression of DR |               |         | Incidence of DR |               |         | Incidence of referable DR |               |         | Incidence of VTDR |               |         |
|-------------------|-----------------------|---------------|---------|-----------------|---------------|---------|---------------------------|---------------|---------|-------------------|---------------|---------|
|                   | Without               | With          | P value | Without         | With          | P value | Without                   | With          | P value | Without           | With          | P value |
| CRAE <sub>B</sub> | 236.283±61.25         | 239.891±70.69 | 0.449   | 235.405±61.03   | 241.207±70.61 | 0.263   | 235.504±61.39             | 249.576±69.75 | 0.035   | 236.546±61.82     | 239.299±67.34 | 0.783   |
| CRVE <sub>B</sub> | 321.197±80.56         | 327.113±92.59 | 0.344   | 320.286±80.34   | 330.446±92.31 | 0.134   | 320.395±80.72             | 340.082±91.90 | 0.011   | 321.766±81.20     | 322.632±88.27 | 0.947   |
| AVR <sub>B</sub>  | 0.742±0.08            | 0.738±0.08    | 0.490   | 0.741±0.08      | 0.734±0.08    | 0.254   | 0.741±0.08                | 0.739±0.09    | 0.818   | 0.741±0.08        | 0.749±0.09    | 0.547   |
| CRAE <sub>C</sub> | 224.195±60.15         | 228.507±67.50 | 0.345   | 223.388±59.95   | 229.697±67.03 | 0.201   | 223.493±60.18             | 238.174±66.82 | 0.011   | 224.520±60.58     | 228.384±68.29 | 0.693   |
| CRVE <sub>C</sub> | 300.315±78.07         | 307.636±89.64 | 0.227   | 299.478±77.88   | 311.037±89.60 | 0.080   | 299.636±78.20             | 321.001±89.64 | 0.013   | 300.972±78.73     | 306.891±85.86 | 0.641   |
| AVR <sub>C</sub>  | 0.753±0.08            | 0.750±0.08    | 0.480   | 0.753±0.08      | 0.746±0.08    | 0.219   | 0.753±0.08                | 0.749±0.08    | 0.606   | 0.753±0.08        | 0.746±0.07    | 0.603   |
| FD <sub>C</sub>   | 1.240±0.04            | 1.243±0.04    | 0.364   | 1.240±0.04      | 1.243±0.04    | 0.303   | 1.240±0.04                | 1.250±0.04    | 0.006   | 1.240±0.04        | 1.238±0.05    | 0.726   |
| AFD <sub>C</sub>  | 1.104±0.04            | 1.103±0.05    | 0.914   | 1.103±0.04      | 1.103±0.04    | 0.919   | 1.103±0.04                | 1.109±0.04    | 0.161   | 1.104±0.04        | 1.104±0.05    | 0.992   |
| VFD <sub>C</sub>  | 1.095±0.04            | 1.101±0.04    | 0.023   | 1.095±0.04      | 1.102±0.04    | 0.014   | 1.095±0.04                | 1.109±0.04    | <0.001  | 1.095±0.04        | 1.092±0.04    | 0.608   |

CRAE<sub>B</sub>, central retinal artery equivalent (CRAE) in Zone B; CRVE<sub>B</sub>, central retinal vein equivalent (CRVE) in Zone B; AVR<sub>B</sub>, arteriolar-to-venular diameter ratio in Zone B; CRAE<sub>C</sub>, CRAE in Zone C; CRVE<sub>C</sub>, CRVE in Zone C; AVR<sub>C</sub>, arteriolar-to-venular diameter ratio in Zone C; FD<sub>C</sub>, total vascular fractal dimension in Zone C; AFD<sub>C</sub>, arteriolar fractal dimension in Zone C; VFD<sub>C</sub>, venular fractal dimension in Zone C.



**Supplementary Table 5. Relationships between retinal vascular measures (per SD increase) and any progression of DR, incidence of DR, referable DR, and VTDR.**

|                   | Any progression of DR |         | Incidence of DR     |         | Incidence of referable DR |         | Incidence of VTDR   |         |
|-------------------|-----------------------|---------|---------------------|---------|---------------------------|---------|---------------------|---------|
|                   | HR (95% CI)           | P value | HR (95% CI)         | P value | HR (95% CI)               | P value | HR (95% CI)         | P value |
| CRAE <sub>B</sub> | 1.070 (0.939,1.219)   | 0.311   | 1.111 (0.962,1.283) | 0.151   | 1.269 (1.047,1.537)       | 0.015   | 0.992 (0.727,1.352) | 0.958   |
| CRVE <sub>B</sub> | 1.098 (0.961,1.254)   | 0.170   | 1.166 (1.006,1.351) | 0.041   | 1.318 (1.081,1.608)       | 0.006   | 0.982 (0.720,1.339) | 0.909   |
| AVR <sub>B</sub>  | 0.941 (0.827,1.071)   | 0.359   | 0.901 (0.782,1.039) | 0.153   | 0.955 (0.796,1.145)       | 0.617   | 1.034 (0.769,1.389) | 0.825   |
| CRAE <sub>C</sub> | 1.085 (0.952,1.237)   | 0.221   | 1.126 (0.975,1.301) | 0.105   | 1.293 (1.067,1.567)       | 0.009   | 1.020 (0.747,1.391) | 0.903   |
| CRVE <sub>C</sub> | 1.117 (0.978,1.277)   | 0.103   | 1.190 (1.026,1.379) | 0.021   | 1.357 (1.111,1.656)       | 0.003   | 1.042 (0.761,1.428) | 0.797   |
| AVR <sub>C</sub>  | 0.950 (0.835,1.082)   | 0.442   | 0.905 (0.784,1.045) | 0.173   | 0.944 (0.784,1.136)       | 0.542   | 0.896 (0.649,1.237) | 0.504   |
| FD <sub>C</sub>   | 1.065 (0.937,1.210)   | 0.338   | 1.080 (0.939,1.242) | 0.282   | 1.294 (1.077,1.555)       | 0.006   | 0.970 (0.716,1.313) | 0.842   |
| AFD <sub>C</sub>  | 0.991 (0.872,1.126)   | 0.885   | 0.992 (0.863,1.140) | 0.909   | 1.140 (0.950,1.368)       | 0.159   | 1.006 (0.742,1.363) | 0.970   |
| VFD <sub>C</sub>  | 1.166 (1.026,1.326)   | 0.018   | 1.189 (1.034,1.366) | 0.015   | 1.443 (1.204,1.730)       | <0.001  | 0.962 (0.707,1.307) | 0.802   |

Data are presented as HR (95% CI). HRs were estimated as per SD increase.

All groups were adjusted for age at baseline.

CRAE<sub>B</sub>, central retinal artery equivalent (CRAE) in Zone B; CRVE<sub>B</sub>, central retinal vein equivalent (CRVE) in Zone B; AVR<sub>B</sub>, arteriolar-to-venular diameter ratio in Zone B; CRAE<sub>C</sub>, CRAE in Zone C; CRVE<sub>C</sub>, CRVE in Zone C; AVR<sub>C</sub>, arteriolar-to-venular diameter ratio in Zone C; FD<sub>C</sub>, total vascular fractal dimension in Zone C; AFD<sub>C</sub>, arteriolar fractal dimension in Zone C; VFD<sub>C</sub>, venular fractal dimension in Zone C.

**Supplementary Table 6. Performance of adding retinal vascular geometry to the metadata model for predictive tasks in the internal test set.**

| Outcome                   | Metadata model       | Metadata model<br>+ CRAE <sub>B</sub> + CRVE <sub>B</sub> + CRAE <sub>C</sub> + CRVE <sub>C</sub> + VFD <sub>C</sub> | Fundus model         | P value |
|---------------------------|----------------------|----------------------------------------------------------------------------------------------------------------------|----------------------|---------|
| Any progression of DR     | 0.699 (0.669, 0.728) | 0.717 (0.686, 0.747)                                                                                                 | 0.826 (0.797, 0.853) | <0.001  |
| Incidence of DR           | 0.707 (0.672, 0.738) | 0.725 (0.693, 0.757)                                                                                                 | 0.828 (0.798, 0.854) | <0.001  |
| Incidence of referable DR | 0.701 (0.658, 0.742) | 0.726 (0.684, 0.765)                                                                                                 | 0.822 (0.785, 0.855) | <0.001  |
| Incidence of VTDR         | 0.712 (0.637, 0.779) | 0.734 (0.655, 0.808)                                                                                                 | 0.825 (0.758, 0.880) | 0.067   |

P value: Metadata model + CRAE<sub>B</sub> + CRVE<sub>B</sub> + CRAE<sub>C</sub> + CRVE<sub>C</sub> + VFD<sub>C</sub> vs. Fundus model

CRAE<sub>B</sub>, central retinal artery equivalent (CRAE) in Zone B; CRVE<sub>B</sub>, central retinal vein equivalent (CRVE) in Zone B; CRAE<sub>C</sub>, CRAE in Zone C; CRVE<sub>C</sub>, CRVE in Zone C; VFD<sub>C</sub>, venular fractal dimension in Zone C.

**Supplementary Table 7. Effect of using MoCo v2 on the fundus model performance for predicting any DR progression in the internal test set.**

|                              | AUC (95%CI)          | C-index (95%CI)      |
|------------------------------|----------------------|----------------------|
| Fundus model without MoCo v2 | 0.786 (0.759, 0.812) | 0.777 (0.751, 0.801) |
| Fundus model with MoCo v2    | 0.826 (0.797, 0.853) | 0.823 (0.796, 0.850) |

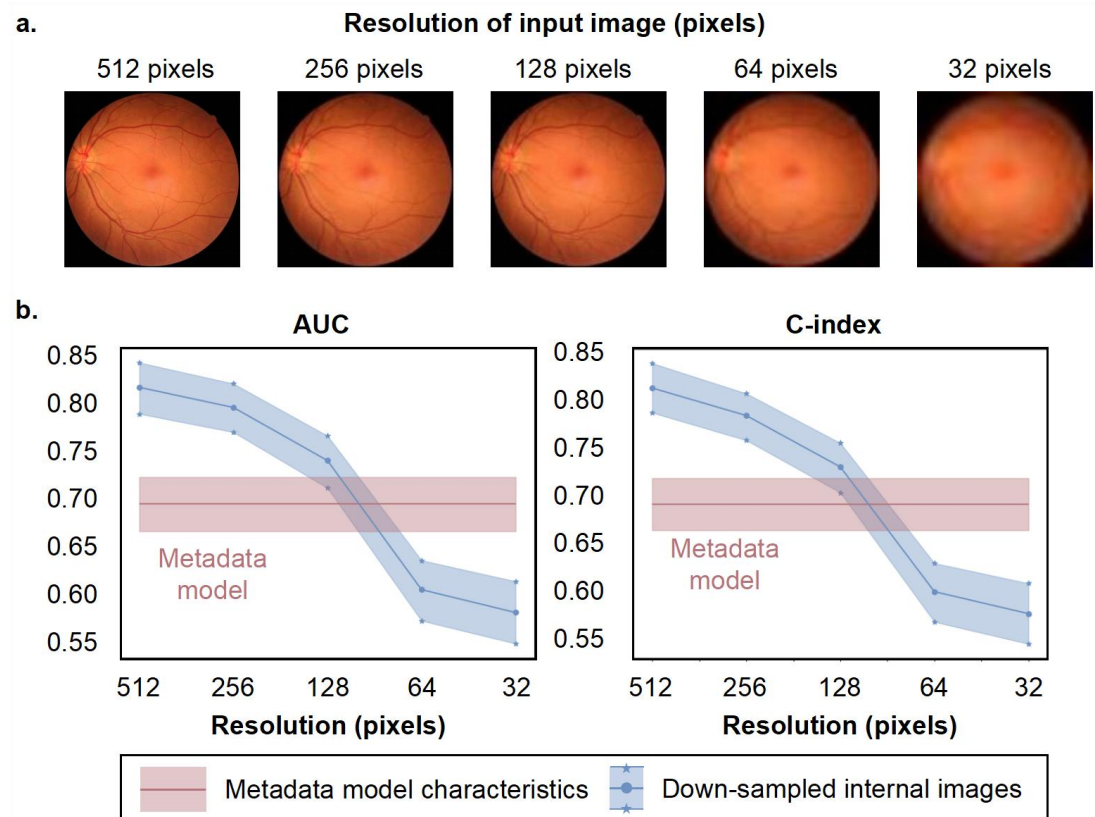

**Supplementary Fig. 1. Impact of image resolution on the predictive performance of the fundus model in the internal test set. a,** Sample images of different resolutions. Images were down-sampled to a certain size (for example, “32 pixels” indicates  $32 \times 32$  pixels) and then up-sampled to the same original input size of  $512 \times 512$  pixels. **b,** AUCs and C-indexes corresponding to different input image resolutions. Data are presented as mean values (lower bound of 95% CI, upper bound of 95% CI) computed using the DeLong method. Shaded areas in **b** are 95% CIs.
